# Supplementary material
Source: PubMed Central journal article supplement (PMC3183366)
Supplement: NIHMS324936-supplement-1_si_001.pdf [file NIHMS324936-supplement-1_si_001.pdf]

# Lysozyme adsorption on polyethylene surfaces: why are long time simulations needed?

Tao Wei, Marcelo A. Carignano, and Igal Szleifer\*

*Department of Biomedical Engineering and Chemistry of Life Processes Institute, Northwestern University, Evanston, IL 60208*

E-mail: [igalsz@northwestern.edu](mailto:igalsz@northwestern.edu)

## Supporting Information

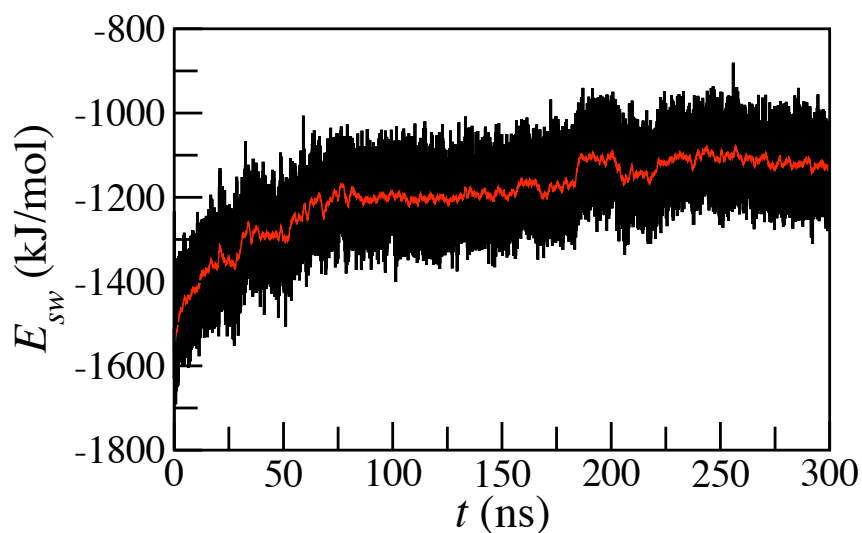

Figure 1: Interaction energy between water and the PE surface as a function of time.

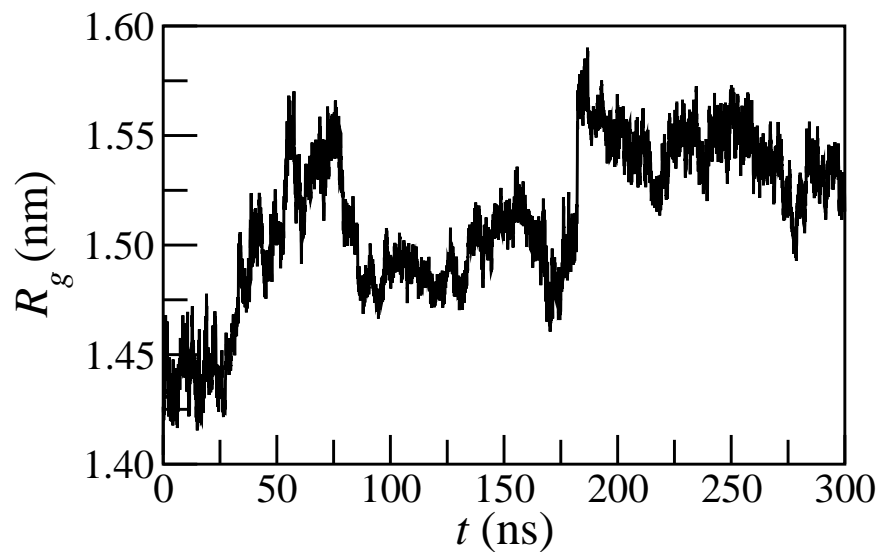

Figure 2: Protein radius of gyration as a function of time.

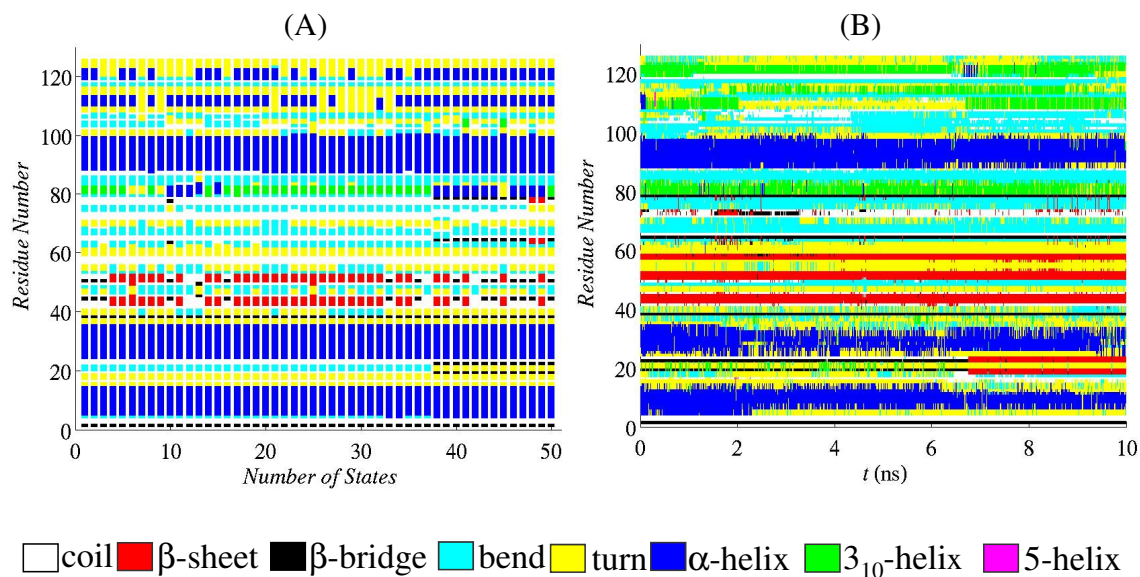

Figure 3: A: Secondary structure of 50 lysozyme as measured by NMR experiments (PDB code: 1E8LA). B: , Secondary structure from the first 10 ns of simulation.
